# Supplementary material for: Staphylococcus aureus Extracellular Vesicles Elicit an Immunostimulatory Response in vivo on the Murine Mammary Gland
Source: Front Cell Infect Microbiol. 2018 Aug 22;8:277. doi: 10.3389/fcimb.2018.00277 (PMC6113362; doi:10.3389/fcimb.2018.00277)
Supplement: Supplementary file 1 [file Table_1.xls]

## Sheet: Table S1
Table S1. Primers used for cDNA quantification by real-time PCR in the PS bovine mammary epithelial cells.
Target cDNA	Sequence	Product size (pb)	Reference
PPIA	Forward: 5'-ATGGCAAGACCAGCAAGAAG-3'	201	Deplanche et al., 2016
	Reverse: 5'-CTTGGAGGGGGATAAGGAAA-3'
RPL19	Forward: 5'-TACTGCCAATGCTCGAATGC-3'	114	Deplanche et al., 2016
	Reverse: 5'-TGATACATGTGGCGGTCAATC-3'
YWHA	Forward: 5'-GTAGGAGCCCGTAGGTCATC-3'	182	Souza et al., 2018
	Reverse: 5'-GCTTGTGAAGCGTTGGGGAT-3'
IL-8	Forward: 5'-TGGGCCACACTGTGAAAAT-3'	92	Deplanche et al., 2016
	Reverse: 5'-TCATGGATCTTGCTTCTCAGC-3'
TNF-α	Forward: 5'-TCTTCTCAAGCCTCAAGTAACAAGC-3'	104	Bougarn et al., 2011
	Reverse: 5'-CCATGAGGGCATTGGCATAC-3'
IL-1β	Forward: 5'-CTCTCACAGGAAATGAACCGAG-3'	152	Bougarn et al., 2011
	Reverse: 5'-GCTGCAGGGTGGGCGTATCACC-3'
DEFβ1	Forward: 5'-CTTCTCTTCCTGGTACTGTCT-3'	140	Bougarn et al., 2011
	Reverse: 5'-GGCGTGAAACAGGTGCCAATC-3'
Deplanche M, Alekseeva L, Semenovskaya K, Fu CL, Dessauge F, Finot L, Petzl W, Zerbe H, Le Loir Y, Rainard P, Smith DGE, Germon P, Otto M, Berkova N. Staphylococcus aureus Phenol-Soluble Modulins Impair Interleukin Expression in Bovine Mammary Epithelial Cells. Infect Immun. 2016 May 24;84(6):1682-1692. doi: 10.1128/IAI.01330-15.
Bougarn S, Cunha P, Gilbert FB, Meurens F, Rainard P. Technical note: Validation of candidate reference genes for normalization of quantitative PCR in bovine mammary epithelial cells responding to inflammatory stimuli. J Dairy Sci. 2011 May;94(5):2425-30. doi: 10.3168/jds.2010-3859.
Souza, R. F. S., Rault, L., Seyffert, N., Azevedo, V., Le Loir, Y., and Even, S. (2018). Lactobacillus casei BL23 modulates the innate immune response in Staphylococcus aureus -stimulated bovine mammary epithelial cells. Beneficial Microbes, 1–12. doi:10.3920/BM2018.0010.
